# Supplementary material
Source: publisher site journal article supplement (https://www.spandidos-publications.com/5159/downloadSupplementary)

Figure S1. Correlation of laboratory parameters with patient age at admission. Platelet (A) activation, (B) Mmp-Index and (C) apoptosis. Plasma (D) TWEAK and (E) Ang-2 levels.  $P < 0.05$  was considered to indicate a statistically significant difference;  $r$ -values indicate correlation coefficient. Mmp, mitochondrial membrane potential; TWEAK, tumor necrosis factor-like weak inducer of apoptosis; Ang-2, angiopoietin-2; APC, allophycocyanin; PE, phycoerythrin.

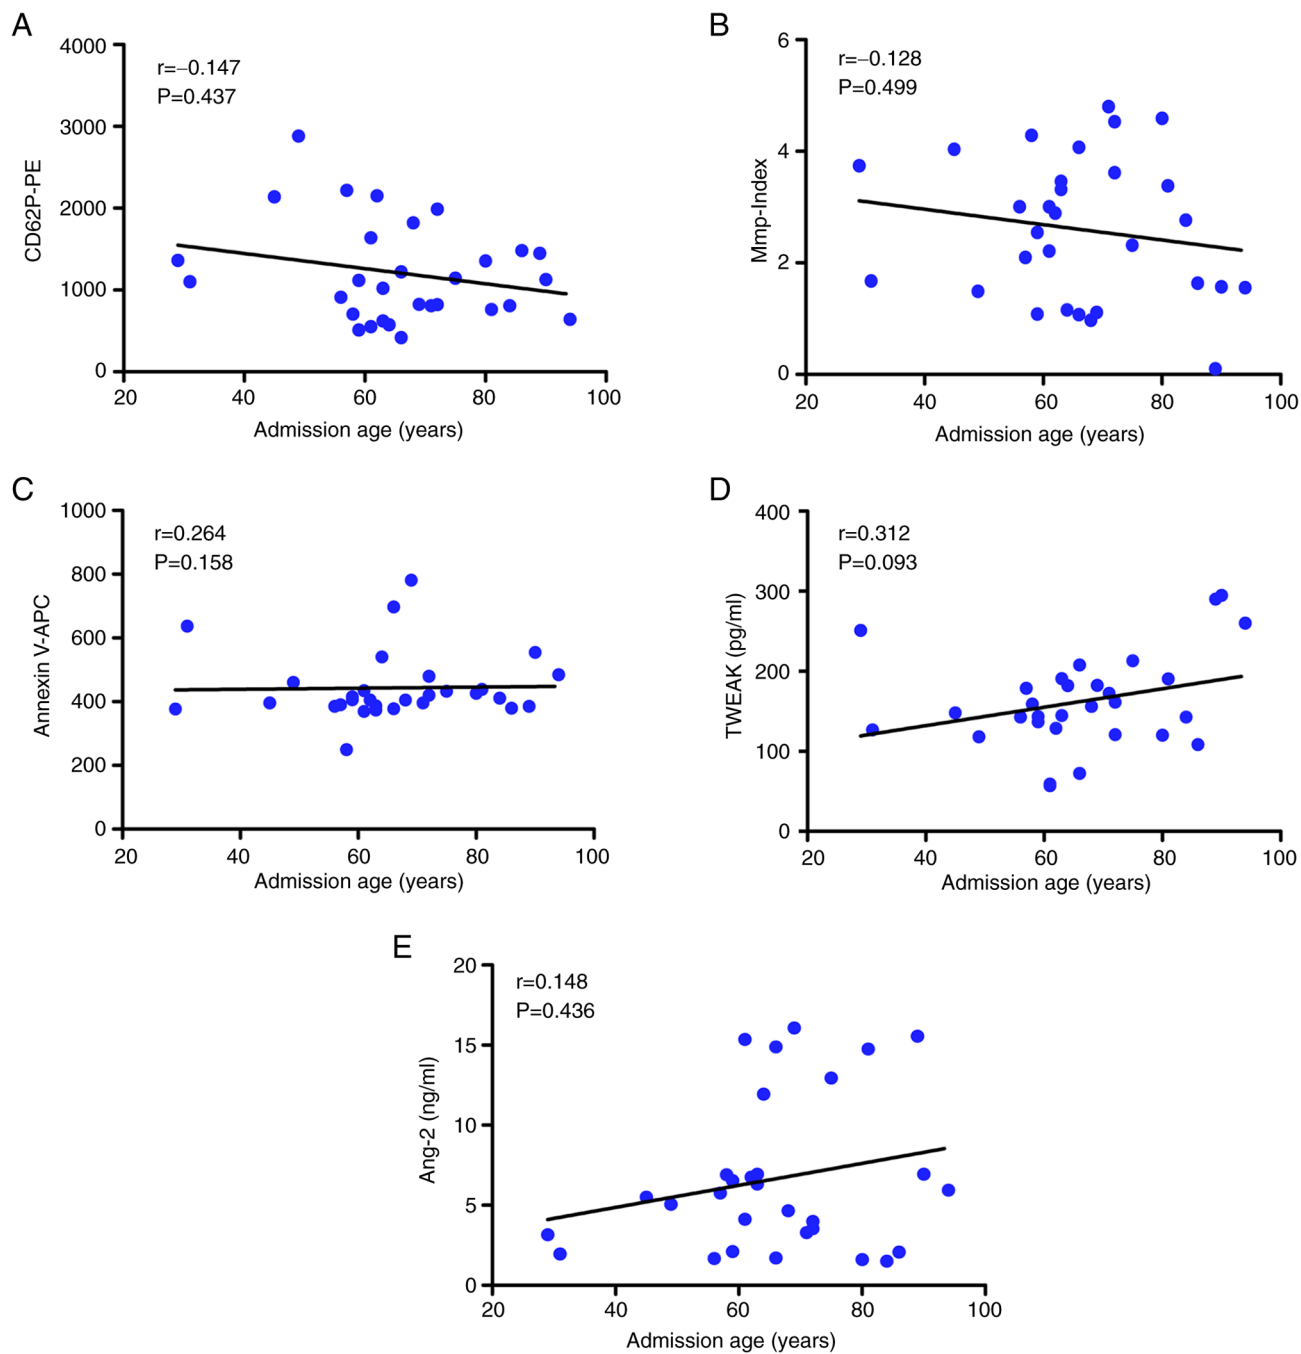

Figure S2. Representative flow cytometry dot plots of platelet-associated markers. G1 gate was set based on the reaction of the platelets with CD62P-PE. Q2 gate was set based on the reaction of the platelets with FITC-conjugated CD41a antibody/ APC-conjugated annexin V. P1 and P2 gates were set based on the reaction of the platelets with cationic dye JC-1. Healthy indicates the healthy control group. SSC-A, side scatter-area; APC, allophycocyanin; PE, phycoerythrin; FITC, fluorescein isothiocyanate; Mmp, mitochondrial membrane potential.

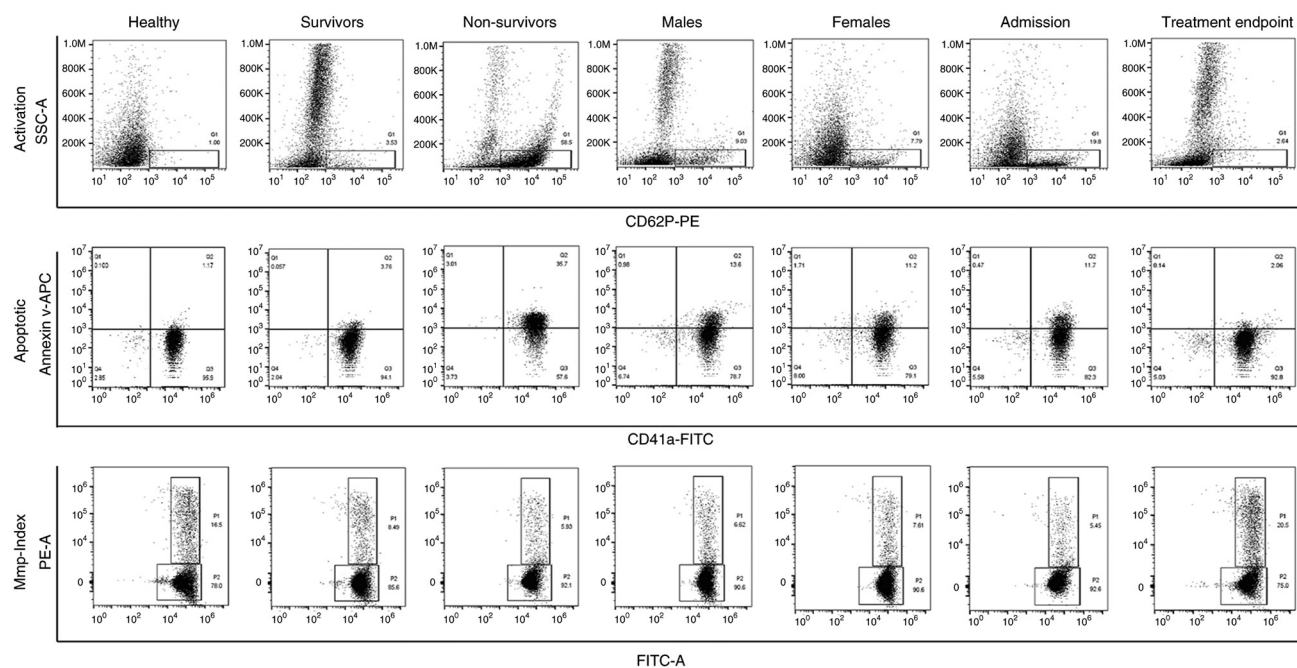

Figure S3. ROC curves of laboratory parameters for the diagnosis of sepsis and septic shock. Platelet (A) activation, (B) Mmp-Index and (C) apoptosis. Plasma (D) TWEAK and (E) Ang-2 levels. ROC, receiver operator curve; AUC, area under the curve; Mmp, mitochondrial membrane potential; TWEAK, tumor necrosis factor-like weak inducer of apoptosis; Ang-2, angiopoietin-2; APC, allophycocyanin; PE, phycoerythrin.  $P < 0.05$  was considered to indicate a statistically significant difference.

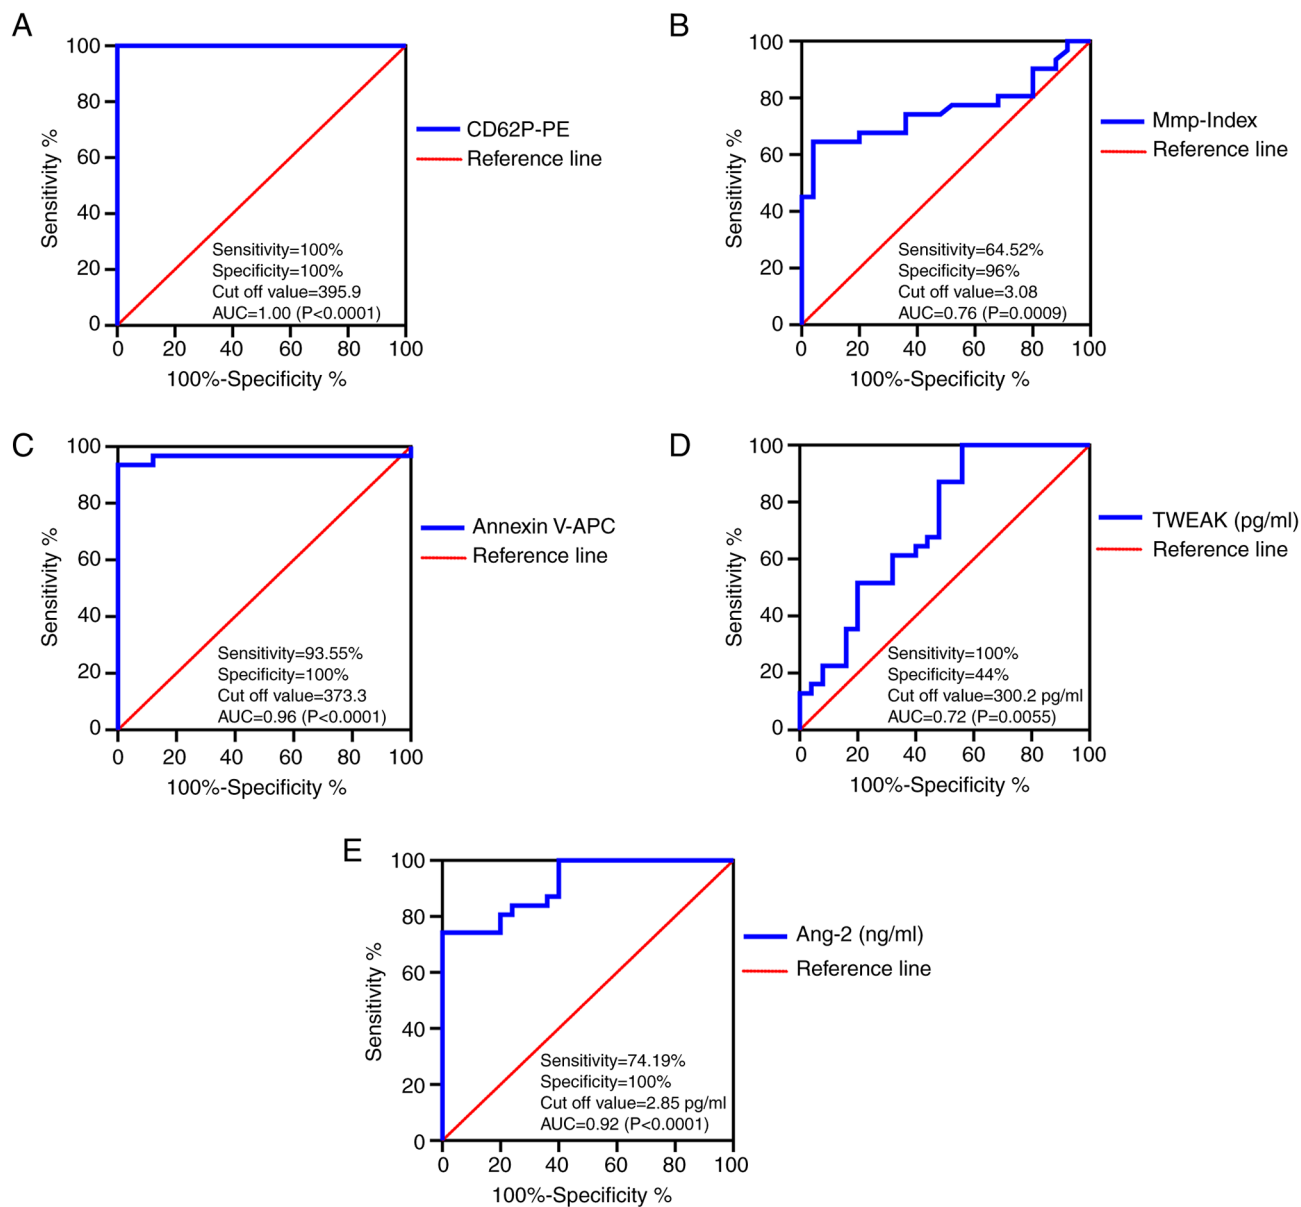

Figure S4. Laboratory parameters of males and females in the patient group. Platelet (A) activation, (B) Mmp-Index and (C) apoptosis. Plasma (D) TWEAK and (E) Ang-2 levels. The solid circles and triangles represent admission and treatment endpoint, respectively. Simple effects analysis was conducted at each level of sample extraction time (admission and treatment endpoint), with an  $\alpha$  level of 0.0125 for each test. Mmp, mitochondrial membrane potential; TWEAK, tumor necrosis factor-like weak inducer of apoptosis; Ang-2, angiopoietin-2; ns, not significant.

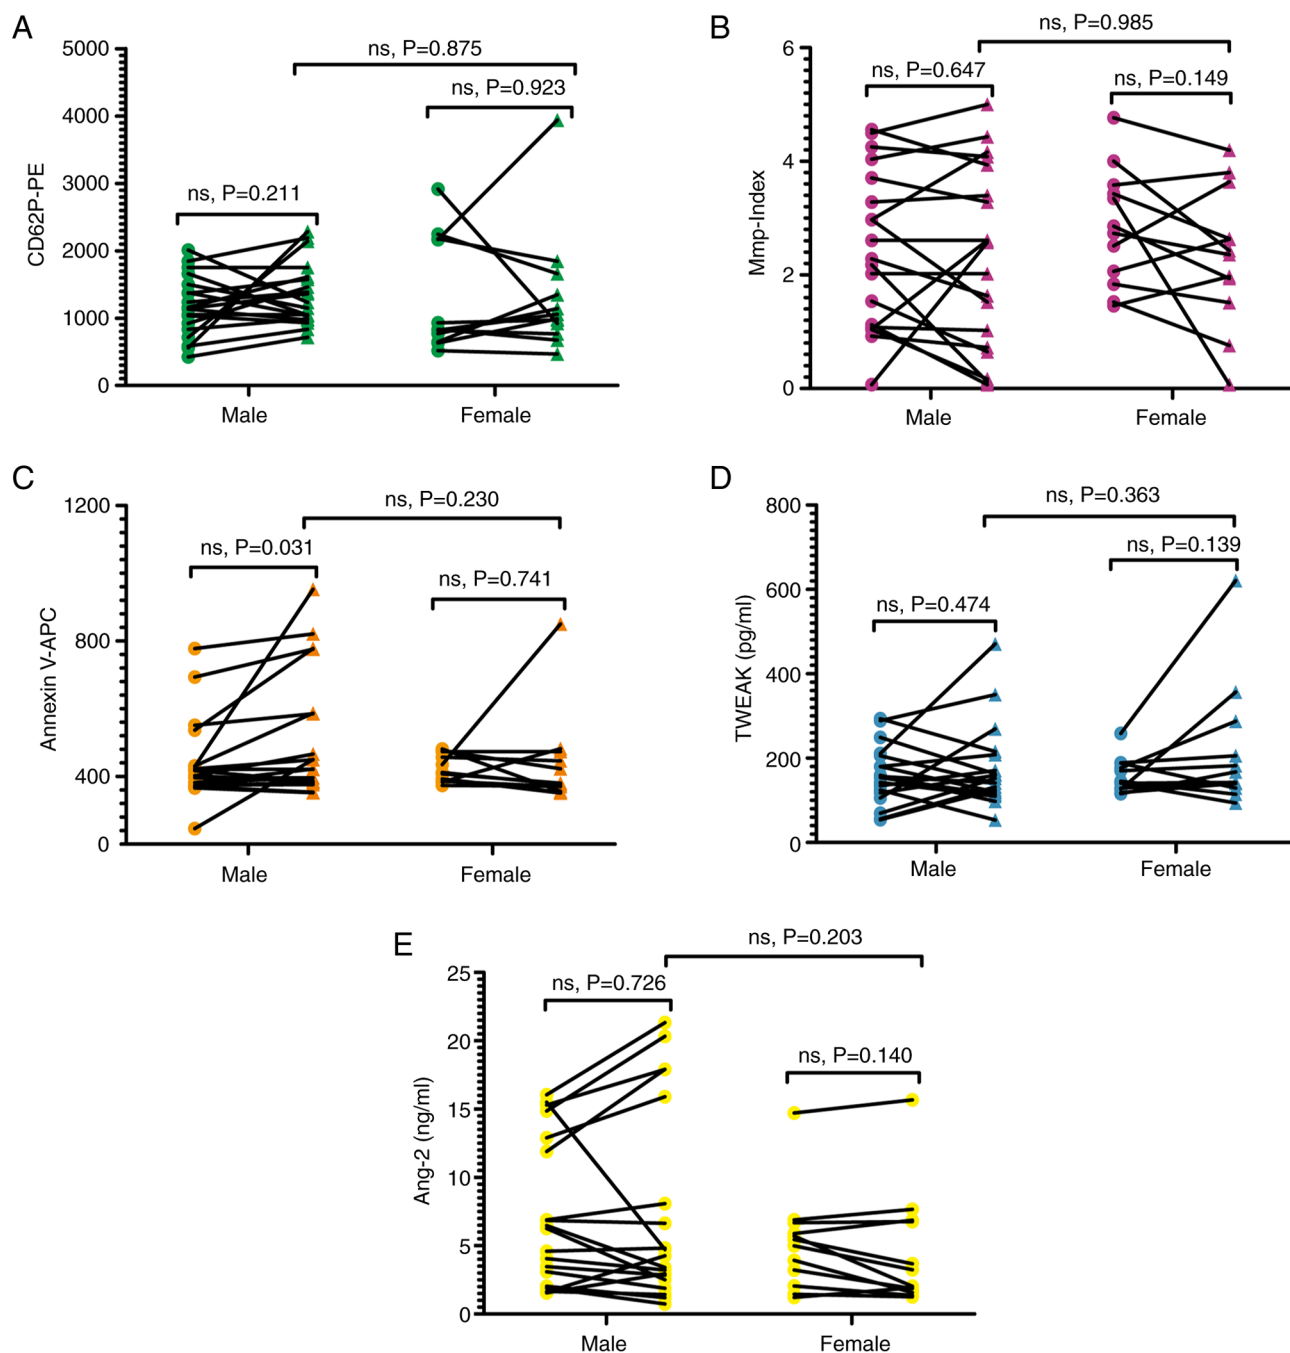

Supplement: Supplementary file 1 [file downloadSupplementary]
